# Supplementary material for: Understanding SNAP Recipient Characteristics to Guide Equitable Expansion of Nutrition Incentive Programs in Diverse Food Retail Settings
Source: MDPI journal article supplement (doi:10.3390/ijerph19094977), 2022-04-20
Supplement: s1 [file s1]

## Supplementary Materials

**Table S1. Participant Characteristics Tested for Differences by Produce Perks Use Status**

|                                                                                                      | P-value for difference                          |                                                                                       |
|------------------------------------------------------------------------------------------------------|-------------------------------------------------|---------------------------------------------------------------------------------------|
|                                                                                                      | Nutrition Incentive Program Users Vs. Non-Users | Nutrition Incentive Program by Location of Use<br>Retail vs. Farmer's Market vs. Both |
| <b>Economic Domain</b>                                                                               |                                                 |                                                                                       |
| Annual Income in dollars                                                                             | <0.001 <sup>a</sup>                             | 0.685 <sup>b</sup>                                                                    |
| Number of people supported by your SNAP                                                              | 0.005 <sup>a</sup>                              | 0.332 <sup>b</sup>                                                                    |
| Amount of SNAP money received last month                                                             | 0.039 <sup>a</sup>                              | 0.152 <sup>b</sup>                                                                    |
| Total years on SNAP (lifetime)                                                                       | 0.848 <sup>a</sup>                              | 0.477 <sup>b</sup>                                                                    |
| Someone in household received WIC in the last year                                                   | 0.896 <sup>c</sup>                              | 0.589 <sup>d</sup>                                                                    |
| Amount spent on fruits and vegetables during a typical month                                         | 0.593 <sup>a</sup>                              | 0.132 <sup>b</sup>                                                                    |
| Over the past 6 months, about how much Produce Perks did you receive from the location of first use? | NA                                              | 0.030 <sup>b</sup>                                                                    |
| You had at least one month in the past year where you did not receive SNAP                           | 0.109 <sup>c</sup>                              | 0.508 <sup>d</sup>                                                                    |
| <b>Spatial Temporal Domain</b>                                                                       |                                                 |                                                                                       |
| It is not convenient to buy fruits and vegetables (1 = strongly disagree, 5 = strongly agree)        | 0.005 <sup>a</sup>                              | 0.339 <sup>b</sup>                                                                    |
| Distance to preferred store                                                                          | 0.020 <sup>a</sup>                              | 0.469 <sup>b</sup>                                                                    |
| How do you usually get to your food store/market/pantry                                              |                                                 |                                                                                       |
| Have a car                                                                                           | 0.051 <sup>c</sup>                              | 0.799 <sup>d</sup>                                                                    |
| Use someone else's car                                                                               | 0.048 <sup>d</sup>                              | 0.468 <sup>d</sup>                                                                    |
| Someone drives me                                                                                    | 0.459 <sup>c</sup>                              | 0.605 <sup>d</sup>                                                                    |
| Walk                                                                                                 | 0.716 <sup>c</sup>                              | 0.323 <sup>d</sup>                                                                    |
| Take a bus                                                                                           | 0.409 <sup>c</sup>                              | 0.280 <sup>d</sup>                                                                    |
| Taxi or taxi service (i.e. Uber, Lyft)                                                               | 0.588 <sup>d</sup>                              | 1.000 <sup>d</sup>                                                                    |

|                                                                                                                                                                                             |                    |                    |
|---------------------------------------------------------------------------------------------------------------------------------------------------------------------------------------------|--------------------|--------------------|
| Ride a bicycle                                                                                                                                                                              | 0.131 <sup>d</sup> | 0.297 <sup>d</sup> |
| Other                                                                                                                                                                                       | 0.756 <sup>d</sup> | 0.218 <sup>d</sup> |
| I never have enough time to shop for fruits and vegetables (1 = strongly disagree, 5 = strongly agree)                                                                                      | 0.159 <sup>a</sup> | 0.548 <sup>b</sup> |
| In the last year I obtained food from a                                                                                                                                                     |                    |                    |
| Supermarket<br>(e.g. Dave's, Kroger, Giant Eagle)                                                                                                                                           | 0.229 <sup>d</sup> | NA                 |
| Supercenter<br>(e.g. Wal-Mart, Target))                                                                                                                                                     | 0.501 <sup>c</sup> | NA                 |
| Smaller grocery store<br>(e.g. Marcs, Aldi, Save a Lot)                                                                                                                                     | 0.796 <sup>d</sup> | NA                 |
| Warehouse club<br>(e.g. Sam's Club, BJ's, Costco)                                                                                                                                           | 0.598 <sup>c</sup> | NA                 |
| Convenience store/Corner store                                                                                                                                                              | 0.567 <sup>c</sup> | NA                 |
| Specialty store<br>(e.g. ethnic stores, bakery, meat market, seafood market, green grocer)                                                                                                  | 0.038 <sup>c</sup> | NA                 |
| Drug Store/Pharmacy<br>(e.g. CVS, Rite Aid, Walgreens)                                                                                                                                      | 0.207 <sup>c</sup> | NA                 |
| Dollar variety<br>(e.g. Dollar General, Dollar Tree, Family Dollar)                                                                                                                         | 0.540 <sup>c</sup> | NA                 |
| Farmer's market                                                                                                                                                                             | 0.034 <sup>c</sup> | NA                 |
| Food pantry/bank or shelter                                                                                                                                                                 | 0.731 <sup>c</sup> | NA                 |
| Mobile Pantry/Free Fruit and Vegetable Drop Off                                                                                                                                             | 0.044 <sup>c</sup> | NA                 |
| Church                                                                                                                                                                                      | 0.543 <sup>c</sup> | NA                 |
| Friends or Family                                                                                                                                                                           | 0.134 <sup>c</sup> | NA                 |
| Another option not listed here                                                                                                                                                              | 0.519 <sup>d</sup> | NA                 |
| Number of visits per month to your primary store                                                                                                                                            | 0.597 <sup>a</sup> | 0.009 <sup>b</sup> |
| <b>Service Domain</b>                                                                                                                                                                       |                    |                    |
| How do the prices of fresh fruits and vegetables at your primary store compare to the prices of fresh fruits and vegetables at the farmers' market? (1 = a lot higher, 5 = a lot lower)     | 0.477 <sup>a</sup> | 0.609 <sup>b</sup> |
| How does the quality of fresh fruits and vegetables at your primary store compare to the quality of fresh fruits and vegetables at the farmers' market? (1 = a lot worse, 5 = a lot better) | 0.168 <sup>a</sup> | 0.201 <sup>b</sup> |

|                                                                                                                                                                                                               |                     |                      |
|---------------------------------------------------------------------------------------------------------------------------------------------------------------------------------------------------------------|---------------------|----------------------|
| How does the variety of fresh fruits and vegetables at your primary store compare to the variety of fresh fruits and vegetables at the farmer's market? (1 = a lot larger variety, 5 = a lot smaller variety) | 0.184 <sup>a</sup>  | < 0.001 <sup>b</sup> |
| How does the service at your primary store compare to the service at the farmer's market? (1 = a lot less welcoming and friendly service, 5 = a lot more welcoming and friendly service)                      | 0.694 <sup>a</sup>  | 0.411 <sup>b</sup>   |
| <b>Social Domain</b>                                                                                                                                                                                          |                     |                      |
| Think about friends, family, or people you know...                                                                                                                                                            |                     |                      |
| About how many shopped at the promoted store offering Produce Perks over the past 6 months? (1=none, 5=all)                                                                                                   | 0.682 <sup>a</sup>  | 0.054 <sup>b</sup>   |
| About how many have used Produce Perks over the past 6 months? (1=none, 5=all)                                                                                                                                | <0.001 <sup>a</sup> | 0.225 <sup>b</sup>   |
| About how many have shopped at your farmers' market over the past 6 months? (1=none, 5=all)                                                                                                                   | 0.054 <sup>a</sup>  | 0.091 <sup>b</sup>   |
| <b>Personal Domain</b>                                                                                                                                                                                        |                     |                      |
| Education<br>(Some high school or less, High school graduate, or Some college or more)                                                                                                                        | 0.061 <sup>a</sup>  | 0.025 <sup>b</sup>   |
| Moved in the last 12 months                                                                                                                                                                                   | 0.050 <sup>c</sup>  | 1.000 <sup>d</sup>   |
| Number of years you have been at your current address                                                                                                                                                         | 0.213 <sup>a</sup>  | 0.958 <sup>b</sup>   |
| Food Insecurity<br>(USDA 6 item food security score > 1, indicating low or very low food security)                                                                                                            | 0.044 <sup>c</sup>  | 0.703 <sup>d</sup>   |
| Food Insecurity<br>(Alternative Ordinal specification: 0 = high food security, 6 = very low food security)                                                                                                    | 0.100 <sup>a</sup>  | 0.577 <sup>b</sup>   |
| How often do you purchase fruits and vegetables when you go to your primary store? (1=never 5=always)                                                                                                         | NA                  | <0.001 <sup>b</sup>  |
| Confidence in preparing fresh green vegetables (1 = not at all confident, 5 = extremely confident)                                                                                                            | 0.273 <sup>a</sup>  | 0.008 <sup>b</sup>   |
| Confidence in preparing root vegetables (1 = not at all confident, 5 = extremely confident)                                                                                                                   | 0.435 <sup>a</sup>  | 0.018 <sup>b</sup>   |
| Confidence in preparing fruit (1 = not at all confident, 5 = extremely confident)                                                                                                                             | 0.426 <sup>a</sup>  | 0.185 <sup>b</sup>   |

|                                                                                                                         |                    |                     |
|-------------------------------------------------------------------------------------------------------------------------|--------------------|---------------------|
| Confidence in preparing fruits and vegetables with herbs and spices (1 = not at all confident, 5 = extremely confident) | 0.430 <sup>a</sup> | 0.153 <sup>b</sup>  |
| I am a healthy eater<br>(1 = Strongly Disagree, 4 = Strongly Agree)                                                     | 0.549 <sup>a</sup> | 0.454 <sup>b</sup>  |
| I am someone who eats in a nutritious manner (1 = Strongly Disagree, 4 = Strongly Agree)                                | 0.161 <sup>a</sup> | 0.600 <sup>b</sup>  |
| I am someone who is careful about what I eat (1 = Strongly Disagree, 4 = Strongly Agree)                                | 0.148 <sup>a</sup> | 0.522 <sup>b</sup>  |
| Total number of people in your household                                                                                | 0.086 <sup>a</sup> | 0.196 <sup>b</sup>  |
| Number of adults in your household                                                                                      | 0.870 <sup>a</sup> | 0.067 <sup>b</sup>  |
| Number of children in your household                                                                                    | 0.034 <sup>a</sup> | 0.107 <sup>b</sup>  |
| Married or have a living partner                                                                                        | 0.623 <sup>c</sup> | 0.352 <sup>d</sup>  |
| Age in Years                                                                                                            | 0.371 <sup>a</sup> | 0.038 <sup>b</sup>  |
| Home (Rent vs. Own vs. Other arrangement)                                                                               | 0.873 <sup>c</sup> | 0.125 <sup>d</sup>  |
| Race                                                                                                                    |                    |                     |
| White                                                                                                                   | 0.552 <sup>c</sup> | 0.503 <sup>d</sup>  |
| Black                                                                                                                   | 0.942 <sup>c</sup> | 0.056 <sup>d</sup>  |
| Other                                                                                                                   | 0.395 <sup>d</sup> | 0.520 <sup>d</sup>  |
| Gender                                                                                                                  | 0.194 <sup>c</sup> | 0.530 <sup>d</sup>  |
| Self-reported health status<br>(1= excellent, 5 = poor)                                                                 | 0.516 <sup>a</sup> | 0.120 <sup>b</sup>  |
| Number of months since first Produce Perks use                                                                          | NA                 | <0.001 <sup>a</sup> |
| What motivated you to use the Produce Perks program?                                                                    |                    |                     |
| The program saves me money                                                                                              | NA                 | 0.855 <sup>d</sup>  |
| The program is easy to use                                                                                              | NA                 | 1.000 <sup>d</sup>  |
| The program is offered at a store close to home                                                                         | NA                 | 0.810 <sup>d</sup>  |
| I was curious to see if the coupon actually worked                                                                      | NA                 | 0.509 <sup>d</sup>  |
| The program allows me to buy more fruits and vegetables)                                                                | NA                 | 0.164 <sup>d</sup>  |

|                                                                                                                              |                    |                    |
|------------------------------------------------------------------------------------------------------------------------------|--------------------|--------------------|
| I have a medical issue that requires me to incorporate more fruits and vegetables into my diet; the program helps me do that | NA                 | 1.000 <sup>d</sup> |
| Other                                                                                                                        | NA                 | 0.532 <sup>d</sup> |
| Number of times per month had fresh juice                                                                                    | 0.893 <sup>a</sup> | 0.170 <sup>b</sup> |
| Number of times per month ate fruit                                                                                          | 0.613 <sup>a</sup> | 0.631 <sup>b</sup> |
| Number of times per month ate beans                                                                                          | 0.148 <sup>a</sup> | 0.062 <sup>b</sup> |
| Number of times per month ate dark green vegetables                                                                          | 0.461 <sup>a</sup> | 0.448 <sup>b</sup> |
| Number of times per month ate orange vegetables                                                                              | 0.669 <sup>a</sup> | 0.287 <sup>b</sup> |
| Number of times per month ate “other” vegetables (beyond beans, dark green, or orange vegetables)                            | 0.168 <sup>a</sup> | 0.007 <sup>b</sup> |
| Number of times per month cooked meals made from scratch or using whole foods                                                | 0.259 <sup>a</sup> | 0.076 <sup>b</sup> |
| Number of times per month ate out                                                                                            | 0.359 <sup>a</sup> | 0.437 <sup>b</sup> |

<sup>a</sup> Wilcoxon-Mann-Whitney test (non-parametric analog of the t-test, assumes ordinal rather than normally distributed interval) <sup>b</sup> Kruskal Wallace (non-parametric analog of ANOVA, assumes ordinal rather than normally distributed interval) <sup>c</sup> Chi-Square test <sup>d</sup> Fischer’s exact test (non-parametric analog of chi-squared test)
